# Supplementary material
Source: Springer Nature journal article supplement (https://www.springermedizin.de/resource/supplementary/13741_2012_6_MOESM6_ESM.pdf/9681988)
Supplement: MOESM6 [file 9681988]

**Table 2. Time to surgery, pain at positioning before spinal and satisfaction scores**

|                                                | <b>Group 1</b>        | <b>Group 2</b>          |
|------------------------------------------------|-----------------------|-------------------------|
|                                                | <b>N=12</b>           | <b>N=12</b>             |
| <b>Time to surgery, mean(SD)</b>               | <b>27.0(+/- 13.6)</b> | <b>31.45(+/-17.9)</b>   |
| <b>VRS before spinal anaesthesia, mean(SD)</b> | <b>6.44(+/- 2.7)</b>  | <b>3.72(+/-3.2)</b>     |
| <b>Overall satisfaction VRS, mean(SD)</b>      | <b>7.6(1.8)</b>       | <b>9.4(1.1), P=0.01</b> |
